# Supplementary material for: Lie to my face: An electromyography approach to the study of deceptive behavior
Source: PubMed Central journal article supplement (PMC8671780; doi:10.1002/brb3.2386), 2021-10-22

**Table S1. Classification results— Stage 1: without monetary incentives.** Each participants' DDM details are shown: number of clusters per DDM, the average cluster size, and the classification accuracy of the best-performing cluster.

| ID    | zyg. stimulus |            |          | zyg. Speech |            |          | zyg. response |            |          | corr. stimulus |            |          | corr. speech |            |          | corr. response |            |          |
|-------|---------------|------------|----------|-------------|------------|----------|---------------|------------|----------|----------------|------------|----------|--------------|------------|----------|----------------|------------|----------|
|       | # c           | avg c size | max acc. | # c         | avg c size | max acc. | # c           | avg c size | max acc. | # c            | avg c size | max acc. | # c          | avg c size | max acc. | # c            | avg c size | max acc. |
| 02_03 | 0             | 0          | 0        | 3           | 12.6       | 81       | 0             | 0          | 0        | 1              | 19         | 60.5     | 2            | 5.5        | 62       | 2              | 13         | 65.5     |
| 02_04 | 10            | 42.3       | 69.5     | 1           | 22         | 61       | 3             | 13         | 70       | 1              | 5          | 65       | 4            | 10.2       | 66       | 1              | 5          | 63       |
| 03_05 | 3             | 19.3       | 72.5     | 1           | 41         | 72       | 5             | 17.8       | 69.5     | 0              | 0          | 0        | 5            | 19.6       | 79.5     | 1              | 32         | 69.5     |
| 03_06 | 1             | 16         | 64.5     | 3           | 10         | 63       | 2             | 18         | 64.5     | 1              | 6          | 65.5     | 1            | 44         | 64.5     | 1              | 15         | 60       |
| 04_09 | 2             | 75         | 67.5     | 0           | 0          | 0        | 3             | 124.3      | 74.5     | 0              | 0          | 0        | 3            | 19.3       | 68.5     | 0              | 0          | 0        |
| 04_10 | 0             | 0          | 0        | 2           | 18         | 71.5     | 0             | 0          | 0        | 1              | 10         | 75       | 0            | 0          | 0        | 0              | 0          | 0        |
| 05_13 | 1             | 7          | 60       | 2           | 17.5       | 59.5     | 0             | 0          | 0        | 3              | 13.3       | 60       | 0            | 0          | 0        | 2              | 11         | 58.5     |
| 05_14 | 5             | 38.2       | 76       | 2           | 0          | 0        | 2             | 21.5       | 70.5     | 0              | 0          | 0        | 0            | 20.5       | 66       | 0              | 0          | 0        |
| 06_15 | 7             | 12.1       | 63       | 0           | 0          | 0        | 8             | 31.1       | 76.5     | 0              | 0          | 0        | 7            | 18         | 64.5     | 1              | 8          | 59.5     |
| 07_18 | 2             | 7          | 63.5     | 1           | 12         | 60.5     | 1             | 11         | 62.5     | 3              | 10.3       | 66       | 3            | 6.3        | 64.5     | 2              | 10.5       | 60.5     |
| 08_19 | 1             | 9          | 65       | 0           | 0          | 0        | 0             | 0          | 0        | 1              | 61         | 67       | 3            | 22.6       | 83.5     | 0              | 0          | 0        |
| 08_20 | 10            | 19.1       | 66       | 7           | 21.5       | 66       | 4             | 14.2       | 64       | 0              | 0          | 0        | 5            | 26.8       | 65       | 1              | 15         | 63.5     |
| 09_27 | 0             | 0          | 0        | 0           | 0          | 0        | 2             | 99.5       | 68.5     | 0              | 0          | 0        | 9            | 31.8       | 73       | 3              | 15.3       | 66       |
| 09_28 | 11            | 16.4       | 63.5     | 2           | 15         | 70.5     | 6             | 33.1       | 68.5     | 0              | 0          | 0        | 4            | 12         | 61.5     | 0              | 0          | 0        |
| 10_07 | 2             | 21         | 67.5     | 6           | 0          | 0        | 0             | 42         | 73.5     | 0              | 0          | 0        | 0            | 0          | 0        | 0              | 0          | 0        |
| 10_08 | 7             | 50.7       | 77       | 3           | 8          | 68.5     | 7             | 44.4       | 82.5     | 5              | 7.2        | 69.5     | 2            | 30         | 74       | 2              | 20.5       | 63       |
| 11_22 | 1             | 22         | 64.5     | 0           | 0          | 0        | 0             | 0          | 0        | 0              | 0          | 0        | 0            | 0          | 0        | 0              | 0          | 0        |
| 12_23 | 0             | 0          | 0        | 3           | 128        | 82       | 0             | 0          | 0        | 6              | 49.1       | 78       | 0            | 0          | 0        | 5              | 37         | 74.5     |
| 12_24 | 0             | 0          | 0        | 0           | 0          | 0        | 0             | 0          | 0        | 3              | 24.3       | 66.5     | 0            | 0          | 0        | 1              | 46         | 61.5     |
| 13_25 | 3             | 5.6        | 67       | 1           | 6          | 60.5     | 10            | 15.6       | 65.5     | 0              | 0          | 0        | 3            | 9.3        | 64.5     | 1              | 7          | 61       |
| 14_11 | 0             | 0          | 0        | 4           | 46.7       | 67.5     | 0             | 0          | 0        | 4              | 45.2       | 70.5     | 1            | 12         | 69.5     | 2              | 26.5       | 76       |
| 14_12 | 0             | 0          | 0        | 8           | 30.6       | 71.5     | 0             | 0          | 0        | 6              | 32.3       | 70       | 1            | 5          | 68.5     | 0              | 0          | 0        |
| 15_29 | 4             | 10.5       | 61       | 7           | 0          | 0        | 8             | 12.1       | 63       | 0              | 0          | 0        | 0            | 10.5       | 62.5     | 0              | 0          | 0        |
| 15_30 | 4             | 17.7       | 67.5     | 0           | 0          | 0        | 7             | 10.7       | 65       | 1              | 12         | 64       | 3            | 7.6        | 63.5     | 1              | 7          | 66.5     |
| 16_31 | 3             | 7.3        | 64.5     | 4           | 9.7        | 70.5     | 4             | 9.75       | 65       | 2              | 15         | 64       | 3            | 9.6        | 64.5     | 1              | 5          | 73.5     |
| 16_32 | 3             | 6.6        | 61       | 9           | 61         | 77       | 2             | 6          | 61       | 4              | 53.2       | 74       | 1            | 9          | 58.5     | 0              | 0          | 0        |
| 17_33 | 4             | 8.7        | 62       | 4           | 11.2       | 64.5     | 5             | 15.6       | 63       | 1              | 8          | 60       | 3            | 9.6        | 64       | 10             | 17.3       | 65.5     |
| 18_37 | 2             | 10         | 60       | 0           | 0          | 0        | 3             | 13.6       | 60       | 2              | 10.5       | 59.5     | 4            | 36.7       | 63.5     | 11             | 36.1       | 63.5     |
| 18_38 | 1             | 28         | 63       | 4           | 20.2       | 65.5     | 0             | 0          | 0        | 1              | 10         | 62.5     | 0            | 0          | 0        | 1              | 7          | 63.5     |
| 19_39 | 2             | 8.5        | 62       | 2           | 11         | 59.5     | 3             | 10.3       | 59.5     | 0              | 0          | 0        | 4            | 10.5       | 63.5     | 1              | 6          | 59       |
| 19_40 | 3             | 14.3       | 64       | 0           | 0          | 0        | 7             | 21.2       | 67.5     | 0              | 0          | 0        | 8            | 18.6       | 67       | 1              | 17         | 67       |
| 20_41 | 3             | 7          | 61       | 0           | 0          | 0        | 6             | 11.8       | 82       | 0              | 0          | 0        | 5            | 9.8        | 61       | 0              | 0          | 0        |
| 21_43 | 1             | 8          | 59       | 6           | 29.1       | 72.5     | 2             | 11.5       | 60.5     | 2              | 129.5      | 76.5     | 0            | 0          | 0        | 0              | 0          | 0        |
| 22_45 | 0             | 0          | 0        | 2           | 7.5        | 60       | 1             | 10         | 60       | 3              | 6          | 64       | 1            | 12         | 61       | 7              | 38.2       | 67       |
| 22_46 | 3             | 7.6        | 67.5     | 4           | 0          | 0        | 4             | 12         | 67       | 0              | 0          | 0        | 0            | 22.7       | 63       | 0              | 0          | 0        |
| 23_47 | 0             | 0          | 0        | 0           | 0          | 0        | 1             | 14         | 82.5     | 0              | 0          | 0        | 1            | 9          | 58.5     | 1              | 8          | 57       |
| 23_48 | 1             | 9          | 59.5     | 0           | 0          | 0        | 4             | 10.5       | 78       | 0              | 0          | 0        | 3            | 10.6       | 58.5     | 1              | 8          | 58       |
| 24_49 | 2             | 88.5       | 67.5     | 2           | 7.5        | 72.5     | 1             | 228        | 75       | 1              | 27         | 66.5     | 1            | 10         | 59.5     | 0              | 0          | 0        |
| 24_50 | 7             | 11.7       | 66       | 0           | 0          | 0        | 4             | 12.5       | 65       | 0              | 0          | 0        | 5            | 14.2       | 65       | 3              | 9.6        | 74.5     |
| 25_52 | 0             | 0          | 0        | 0           | 0          | 0        | 1             | 0          | 0        | 0              | 0          | 0        | 0            | 15         | 81.5     | 0              | 0          | 0        |

c: cluster, acc: accuracy

**Table S2. Classification results—Stage 2: with monetary incentives.** Similar to Table S1, only in trials where participants were presented with monetary incentives for successful deception or detection.

| ID    | zyg. stimulus |            |          | zyg. speech |            |          | zyg. response |            |          | corr. stimulus |            |          | corr. speech |            |          | corr. response |            |          |
|-------|---------------|------------|----------|-------------|------------|----------|---------------|------------|----------|----------------|------------|----------|--------------|------------|----------|----------------|------------|----------|
|       | # c           | avg c size | max acc. | # c         | avg c size | max acc. | # c           | avg c size | max acc. | # c            | avg c size | max acc. | # c          | avg c size | max acc. | # c            | avg c size | max acc. |
| 02_03 | 0             | 0          | 0        | 2           | 16.5       | 64.5     | 0             | 0          | 0        | 2              | 15.5       | 69       | 0            | 0          | 0        | 3              | 24         | 63       |
| 02_04 | 2             | 24.5       | 68       | 3           | 20         | 64.5     | 8             | 18.1       | 71       | 10             | 13.5       | 66       | 9            | 23.8       | 66.5     | 4              | 33         | 65       |
| 03_05 | 4             | 22.5       | 68.5     | 0           | 0          | 0        | 3             | 31         | 81.5     | 0              | 0          | 0        | 0            | 0          | 0        | 1              | 16         | 66       |
| 03_06 | 2             | 70         | 64.5     | 4           | 11         | 61.5     | 4             | 67.5       | 70       | 0              | 0          | 0        | 0            | 0          | 0        | 0              | 0          | 0        |
| 04_09 | 3             | 145        | 70       | 0           | 0          | 0        | 7             | 35.4       | 71       | 0              | 0          | 0        | 4            | 34.7       | 72.5     | 0              | 0          | 0        |
| 04_10 | 0             | 0          | 0        | 2           | 67.5       | 71.5     | 0             | 0          | 0        | 1              | 14         | 70       | 0            | 0          | 0        | 4              | 21.5       | 66       |
| 05_13 | 1             | 12         | 57       | 6           | 23.6       | 62.5     | 0             | 0          | 0        | 7              | 17.2       | 61.5     | 0            | 0          | 0        | 8              | 13         | 62.5     |
| 05_14 | 0             | 0          | 0        | 2           | 0          | 0        | 0             | 10         | 73.5     | 0              | 0          | 0        | 0            | 0          | 0        | 0              | 0          | 0        |
| 06_15 | 5             | 13         | 62.5     | 0           | 0          | 0        | 2             | 18.5       | 60       | 0              | 0          | 0        | 3            | 35.3       | 91.5     | 2              | 9          | 58.5     |
| 07_18 | 8             | 10.5       | 69       | 1           | 7          | 62       | 4             | 20.5       | 65       | 0              | 0          | 0        | 7            | 11.5       | 64       | 0              | 0          | 0        |
| 08_19 | 6             | 24.5       | 75.5     | 7           | 15.2       | 68       | 9             | 19.2       | 77       | 0              | 0          | 0        | 2            | 130        | 85.5     | 1              | 48         | 72.5     |
| 08_20 | 8             | 17.2       | 65       | 3           | 12.3       | 65       | 11            | 20.2       | 67.5     | 5              | 12.8       | 64       | 6            | 14.6       | 81.5     | 2              | 14         | 63       |
| 09_27 | 5             | 17.8       | 49       | 6           | 80.3       | 80.5     | 1             | 21         | 68.5     | 3              | 28.6       | 72.5     | 2            | 63.5       | 70.5     | 3              | 9.6        | 68       |
| 09_28 | 3             | 12.6       | 73       | 0           | 0          | 0        | 7             | 12.8       | 61.5     | 0              | 0          | 0        | 3            | 12         | 62       | 0              | 0          | 0        |
| 10_07 | 0             | 0          | 0        | 7           | 0          | 0        | 4             | 20.4       | 74       | 0              | 0          | 0        | 0            | 91.25      | 72       | 0              | 0          | 0        |
| 10_08 | 3             | 7.6        | 70.5     | 4           | 13.2       | 69.5     | 4             | 24.5       | 72       | 10             | 11.8       | 72.5     | 3            | 15.3       | 68.5     | 2              | 196        | 74.5     |
| 11_22 | 2             | 12         | 63.5     | 6           | 33.8       | 78.5     | 2             | 15.5       | 76       | 1              | 150        | 93.5     | 1            | 5          | 62       | 3              | 33         | 72       |
| 12_23 | 0             | 0          | 0        | 1           | 31         | 70.5     | 2             | 5.5        | 62       | 4              | 11.5       | 67       | 0            | 0          | 0        | 0              | 0          | 0        |
| 12_24 | 2             | 16.5       | 60.5     | 1           | 30         | 63.5     | 3             | 6.6        | 63       | 1              | 37         | 68       | 3            | 13         | 63.5     | 2              | 26         | 65.5     |
| 13_25 | 10            | 20.2       | 68       | 2           | 23.5       | 62       | 16            | 15.3       | 70.5     | 1              | 27         | 66.5     | 14           | 17.5       | 67       | 1              | 21         | 62       |
| 14_11 | 0             | 0          | 0        | 3           | 18         | 68.5     | 1             | 10         | 63.5     | 4              | 35.5       | 71.5     | 2            | 8.5        | 60       | 3              | 19.3       | 72       |
| 14_12 | 0             | 0          | 0        | 6           | 19         | 68.5     | 4             | 20         | 64.5     | 3              | 16         | 64.5     | 1            | 16         | 62.5     | 6              | 10.6       | 74       |
| 15_29 | 6             | 15.5       | 65.5     | 12          | 0          | 0        | 4             | 15.5       | 65       | 0              | 0          | 0        | 0            | 21.7       | 87.2     | 0              | 0          | 0        |
| 15_30 | 17            | 18.4       | 70.5     | 7           | 17.5       | 73.5     | 6             | 25         | 68.5     | 4              | 41.7       | 71       | 5            | 19.4       | 68       | 3              | 64.6       | 73.5     |
| 16_31 | 7             | 16.4       | 68       | 6           | 72.5       | 79.5     | 14            | 21         | 71       | 2              | 18         | 71       | 6            | 36.8       | 73.5     | 4              | 70         | 79       |
| 16_32 | 0             | 0          | 0        | 3           | 45.3       | 66.5     | 0             | 0          | 0        | 2              | 52         | 67       | 0            | 0          | 0        | 1              | 27         | 63       |
| 17_33 | 8             | 21.8       | 65       | 1           | 8          | 59       | 7             | 24.8       | 66.5     | 1              | 6          | 61       | 7            | 16.4       | 63.5     | 1              | 7          | 60       |
| 18_37 | 7             | 12.4       | 64       | 4           | 7.2        | 63       | 1             | 6          | 61.5     | 4              | 73         | 63.5     | 6            | 17.8       | 63       | 0              | 0          | 0        |
| 18_38 | 2             | 6          | 61       | 0           | 0          | 0        | 1             | 8          | 60       | 0              | 0          | 0        | 2            | 6.5        | 60.5     | 2              | 9.5        | 60.5     |
| 19_39 | 8             | 26         | 67.5     | 1           | 11         | 59.5     | 7             | 15.8       | 64       | 7              | 10.7       | 63       | 4            | 13.5       | 65       | 6              | 7.1        | 62.5     |
| 19_40 | 5             | 17.6       | 65.5     | 1           | 43         | 67.5     | 6             | 24.8       | 69       | 0              | 0          | 0        | 4            | 17         | 69.5     | 0              | 0          | 0        |
| 20_41 | 8             | 24.3       | 70       | 0           | 0          | 0        | 13            | 19.6       | 69.5     | 1              | 8          | 59       | 9            | 44.4       | 74       | 2              | 6          | 64       |
| 21_43 | 0             | 0          | 0        | 0           | 0          | 0        | 2             | 6          | 61       | 1              | 20         | 68       | 1            | 18         | 59       | 3              | 6.6        | 68       |
| 22_45 | 10            | 21.2       | 65       | 7           | 20.8       | 67       | 8             | 11.6       | 63.5     | 8              | 9.8        | 65       | 2            | 14.5       | 61.5     | 6              | 45.1       | 68       |
| 22_46 | 4             | 10.7       | 63.5     | 8           | 0          | 0        | 7             | 9.5        | 65       | 0              | 0          | 0        | 0            | 9.8        | 64       | 0              | 0          | 0        |
| 23_47 | 0             | 0          | 0        | 3           | 13         | 63.5     | 0             | 0          | 0        | 3              | 9.6        | 62       | 3            | 11         | 67       | 11             | 22.2       | 66       |
| 23_48 | 4             | 9.5        | 61       | 2           | 10.5       | 60       | 7             | 12.1       | 88.2     | 1              | 5          | 60.5     | 6            | 11.1       | 65       | 0              | 0          | 0        |
| 24_49 | 1             | 59         | 67       | 2           | 11.5       | 59       | 1             | 189        | 65       | 0              | 0          | 0        | 1            | 23         | 63       | 2              | 9          | 64.5     |
| 24_50 | 4             | 17.5       | 85.8     | 1           | 12         | 67.5     | 7             | 16.5       | 68.5     | 2              | 10.5       | 70       | 4            | 17.2       | 69.5     | 1              | 7          | 63.5     |
| 25_52 | 1             | 9          | 78       | 2           | 0          | 0        | 0             | 10.5       | 59.5     | 0              | 0          | 0        | 0            | 0          | 0        | 0              | 0          | 0        |

c: cluster, acc: accuracy

**Figure S1. An exemplary participant's sEMG signal during the calibration phase.** The participant performed three voluntary smiling followed by three eyebrows contracting with a neutral expression in between (in response to a cued video). Each expression was performed for 3 s with a 3 s gap in between. Top 5 signals originate from electrodes placed over the *Zygomaticus major* (ZM) muscle (cheek region) and bottom 3 electrodes were placed over the *Corrugator supercilii* (CS) muscle (eyebrow region).

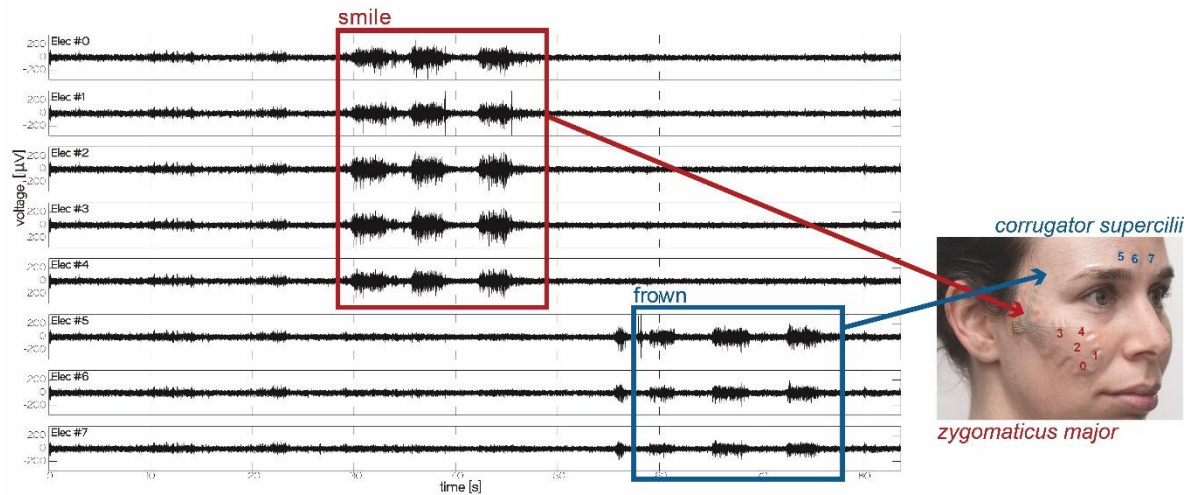

**Figure S2. A flow chart of sEMG analysis stages.** Starting with preprocessing, through signal selection, machine-learning classification analyses on the individual-participant level, and the aggregate multi-subject analyses.

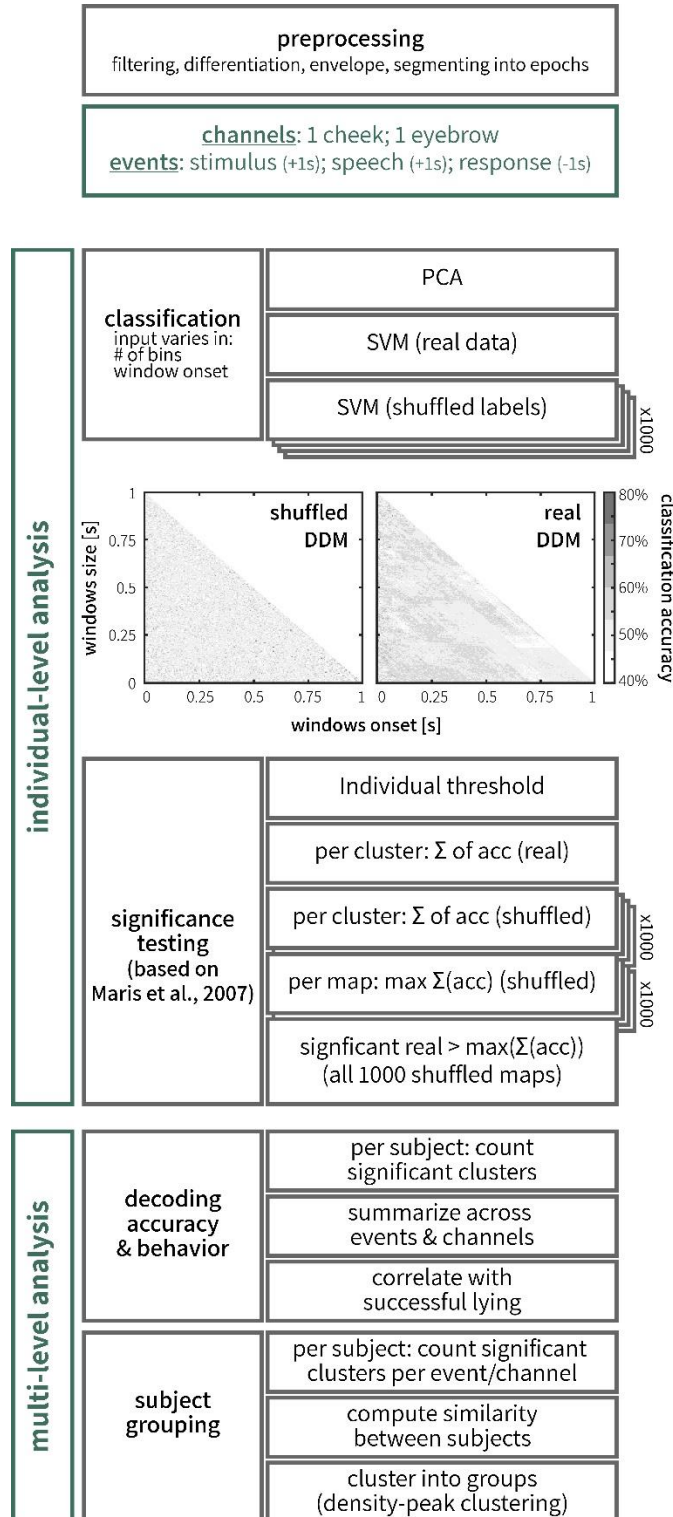

Supplement: BRB3-11-e2386-s001.pdf [file BRB3-11-e2386-s001.pdf]
